# Supplementary material for: A non-toxic triboelectric nanogenerator for baby care applications
Source: Royal Society of Chemistry journal article supplement (doi:10.1039/d0ta08909e), 2020-01-01
Supplement: d0ta08909e1.pdf [file d0ta08909e1.pdf]

## Supporting Information

### An Edible Triboelectric Nanogenerator for Babycare Application

Kang Yan<sup>a†</sup>, Xiao Li<sup>a†</sup>, Xiao-Xiong Wang<sup>a\*</sup>, Miao Yu<sup>c</sup>, Zhiyong Fan<sup>b</sup>, Seeram  
Ramakrishna<sup>d</sup>, Han Hu<sup>e</sup> and Yun-Ze Long<sup>a\*</sup>

<sup>a</sup> *Collaborative Innovation Center for Nanomaterials & Devices, College of Physics,  
Qingdao University, Qingdao 266071, China*

<sup>b</sup> *Department of Electronic & Computer Engineering, The Hong Kong University of  
Science & Technology, Kowloon, Hong Kong, China*

<sup>c</sup> *Department of Mechanical Engineering, Columbia University, New York, NY 10027,  
USA*

<sup>d</sup> *Center for Nanofibers & Nanotechnology, National University of Singapore,  
Singapore*

<sup>e</sup> *State Key Laboratory of Heavy Oil Processing, College of Chemical Engineering,  
China University of Petroleum (East China), Qingdao, 266580, China*

---

<sup>†</sup>These two authors contributed equally to this work.

\*Corresponding author. Tel: +86 139 5329 0681

E-mail: [yunze.long@qdu.edu.cn](mailto:yunze.long@qdu.edu.cn) (Y Long) or [wangxiaoxiong69@163.com](mailto:wangxiaoxiong69@163.com) (X Wang)

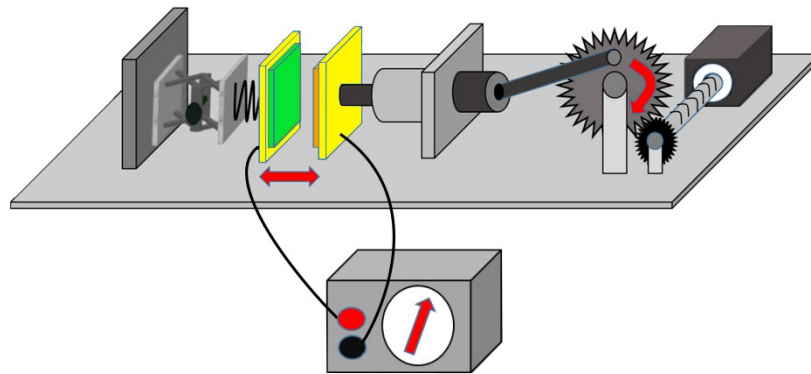

**Figure S1** Schematic diagram of the TENG test set.

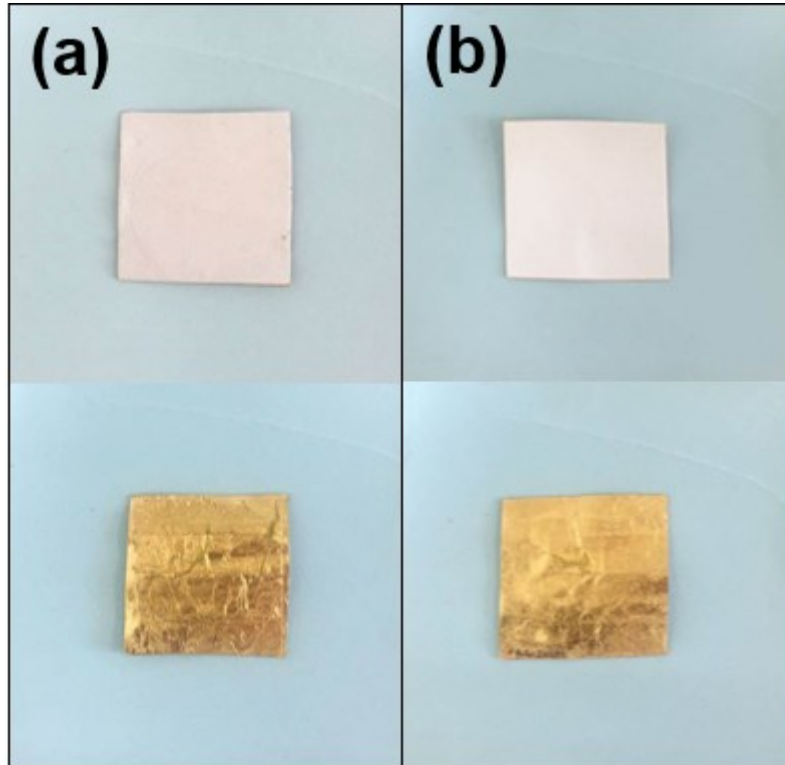

**Figure S2** Physics diagram of TENG. (a) CMCS (b) CMC-Na

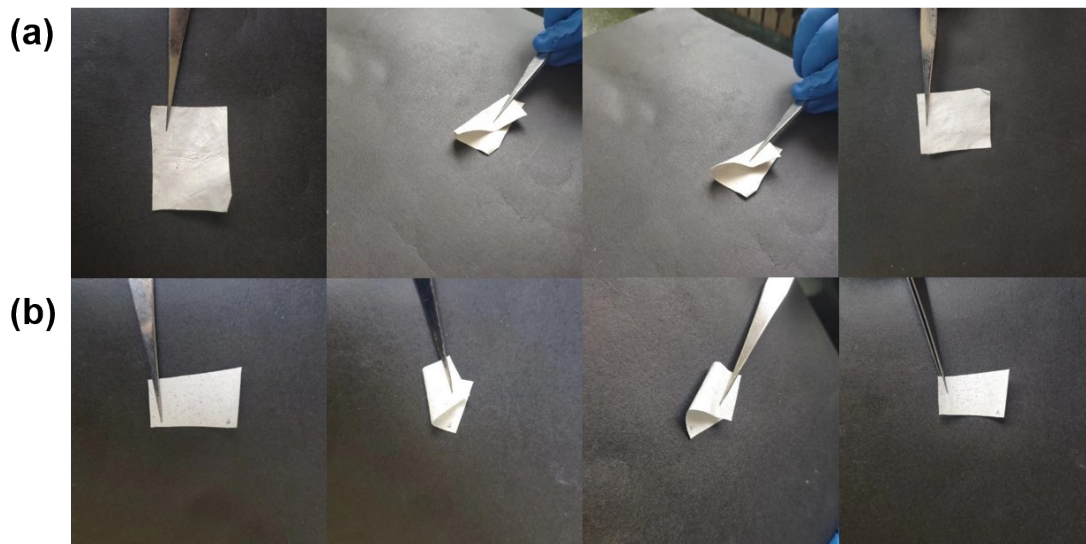

**Figure S3** (a) Flexibility of CMCS fiber membrane. (b) Flexibility of CMC-Na fiber membrane.

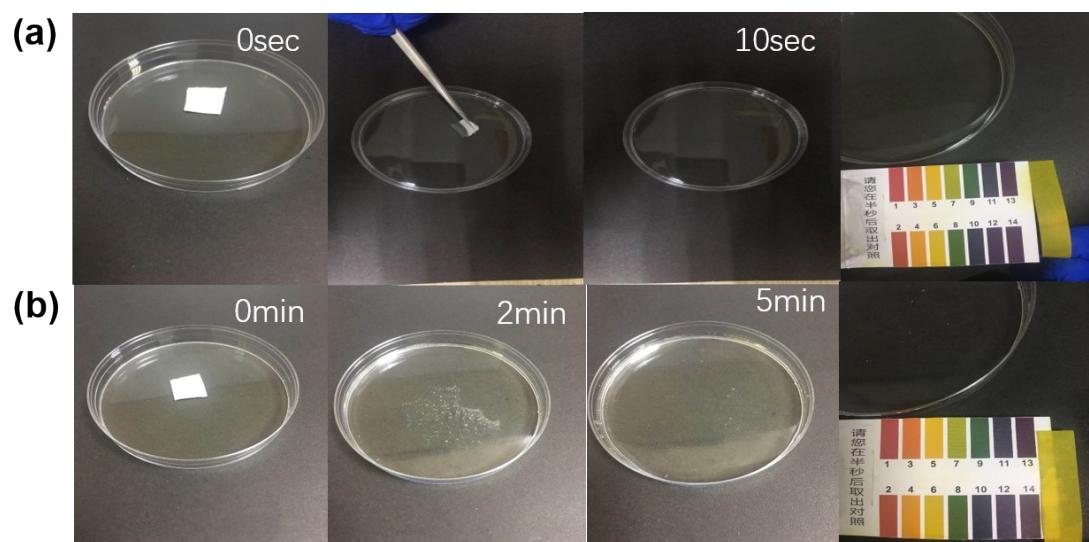

**Figure S4** (a) Water solubility of CMCS fiber membrane. (b) Water solubility of CMC-Na fiber membrane.

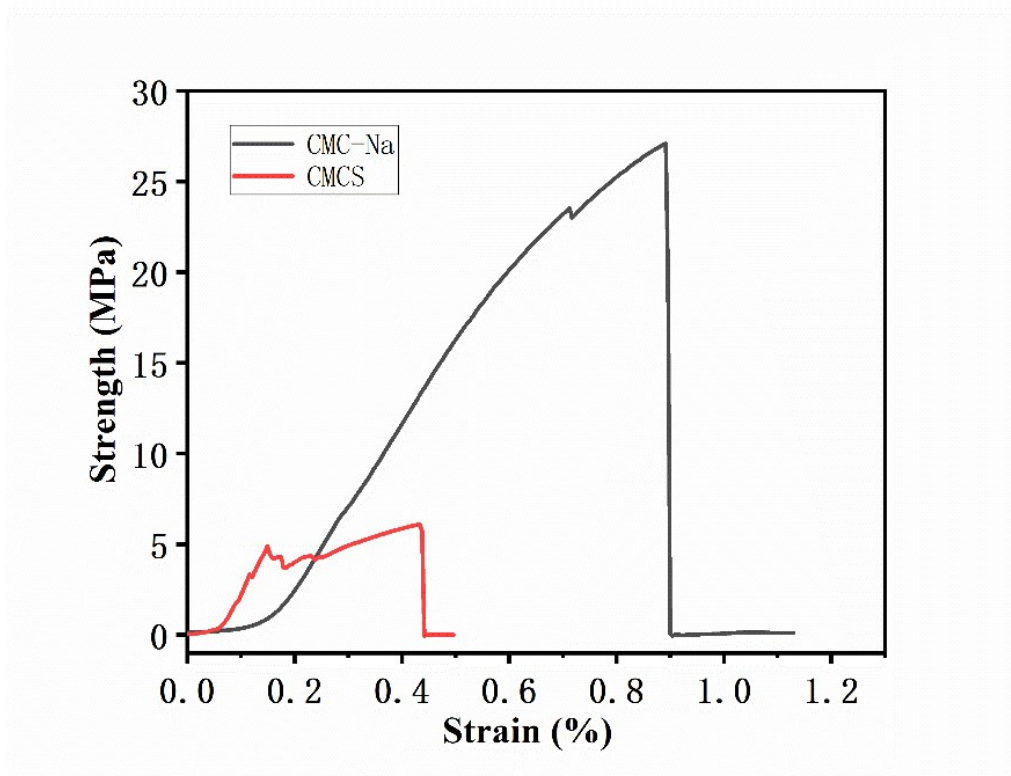

**Figure S5** Tensile properties of CMCS fiber membrane and CMC-Na fiber membrane.

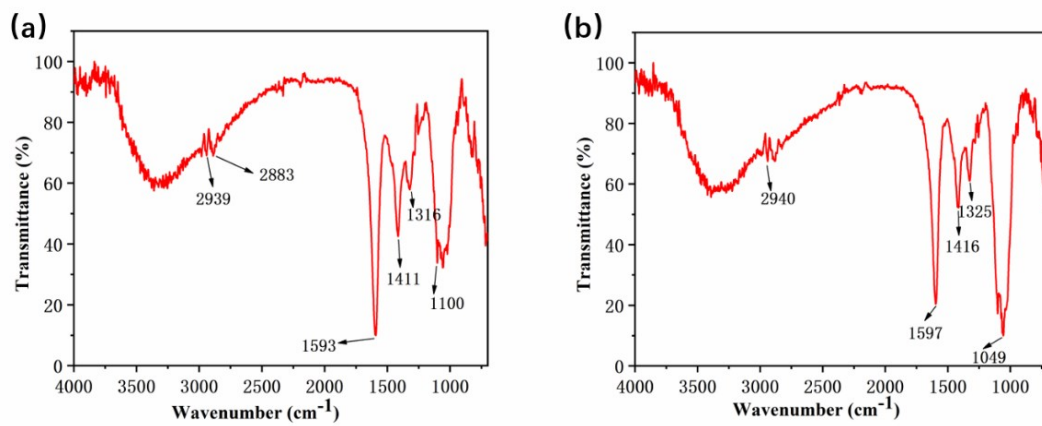

**Figure S6** FTIR spectra of the nanofiber membranes. (a) FTIR spectra of CMCS nanofiber membrane. (b) FTIR spectra of CMC-Na nanofiber membrane.

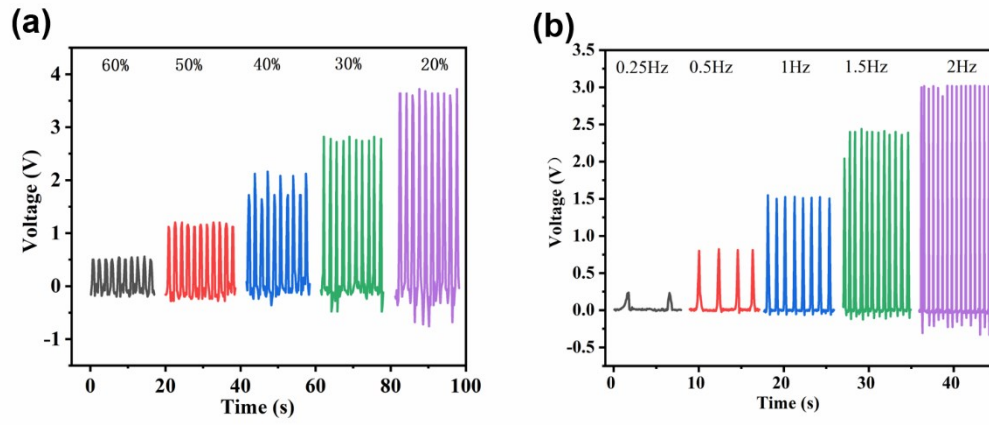

**Figure S7** The open circuit voltage of TENG under different (a) ambient humidity, (b) impact frequency.
